# Supplementary material for: An optoelectronic synaptic transistor with efficient dual modulation by light illumination
Source: Royal Society of Chemistry journal article supplement (doi:10.1039/d0tc05738j), 2021-01-01
Supplement: d0tc05738j1.pdf [file d0tc05738j1.pdf]

## Supporting Information

### Optoelectronic Synaptic Transistor with Efficient Dual Modulation by Light

#### Illumination

Shuqiong Lan,<sup>a</sup> Jianfeng Zhong,<sup>b</sup> Jinwei Chen,<sup>b</sup> Weixin He,<sup>b</sup> Lihua He,<sup>b</sup> Rengjian Yu,<sup>b</sup> Gengxu Chen<sup>b,c\*</sup> and Huipeng Chen<sup>b,c\*</sup>

<sup>a</sup> Department of Physics, School of Science, Jimei University, Xiamen 361021, China

<sup>b</sup> Institute of Optoelectronic Display, National & Local United Engineering Lab of Flat Panel Display Technology, Fuzhou University, Fuzhou 350002, China

<sup>c</sup> Fujian Science & Technology Innovation Laboratory for Optoelectronic Information of China, Fuzhou 350100, China

E-mail: gxchen@fzu.edu.cn; hpchen@fzu.edu.cn

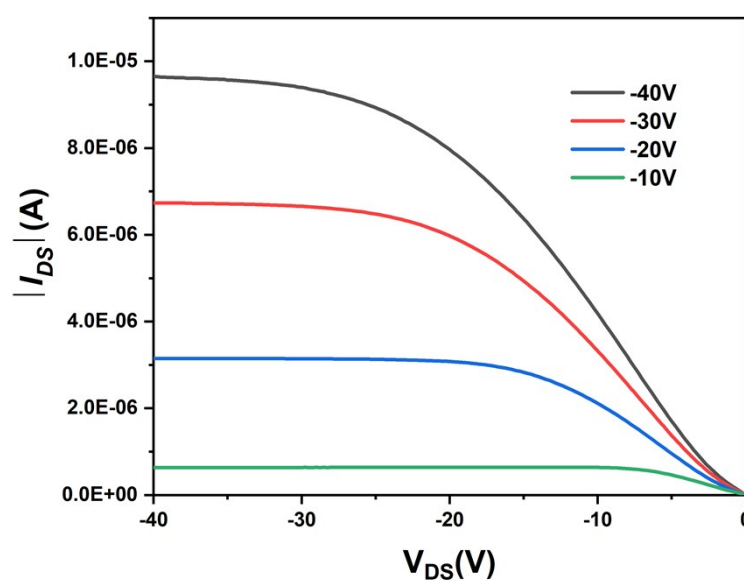

**Fig. S1** Output curves of the transistor based on p-n bulk heterojunction blends.

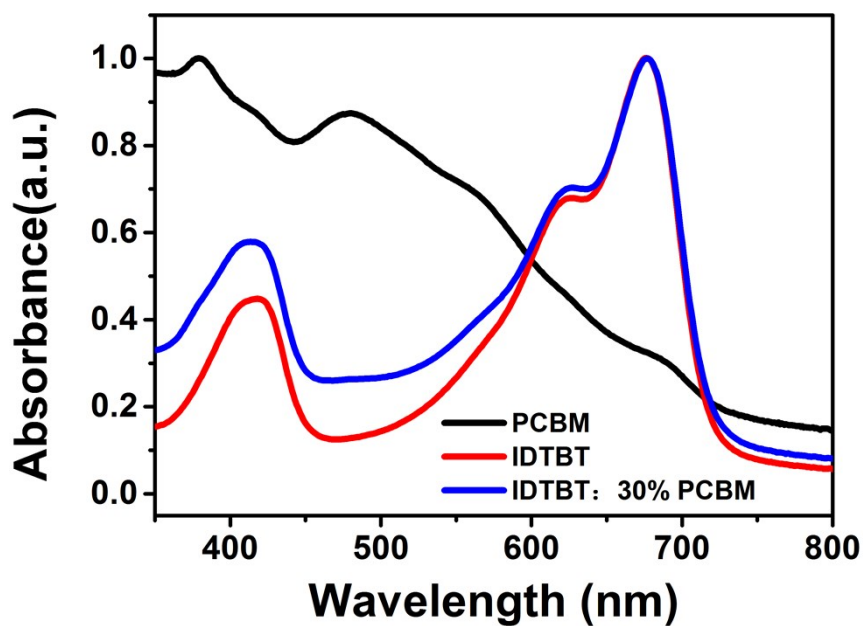

**Fig. S2** Absorption spectra of pristine PCBM, pristine IDTBT, and IDTBT blending with 30% PCBM.

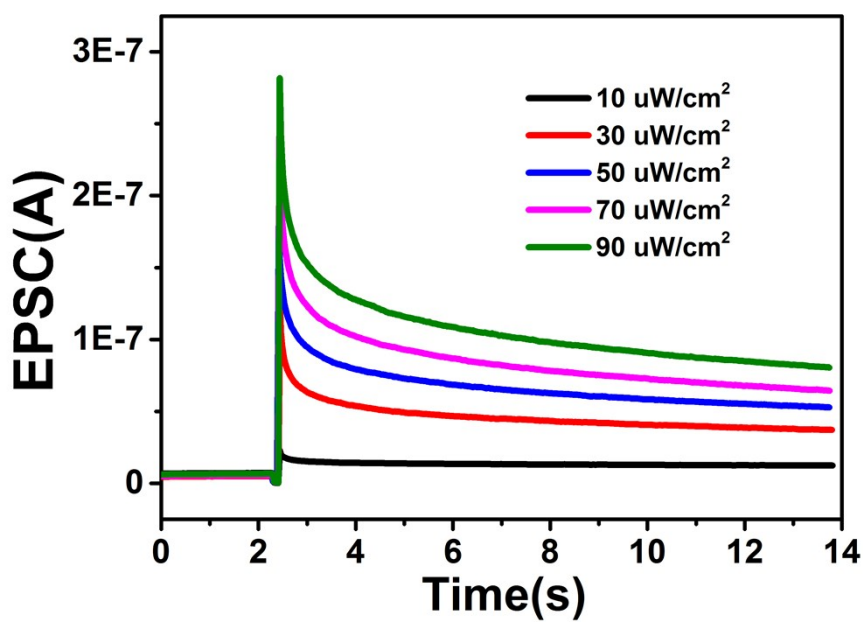

**Fig. S3** EPSC generated with different light intensity and the same voltage pulse (10 V, 150 ms).

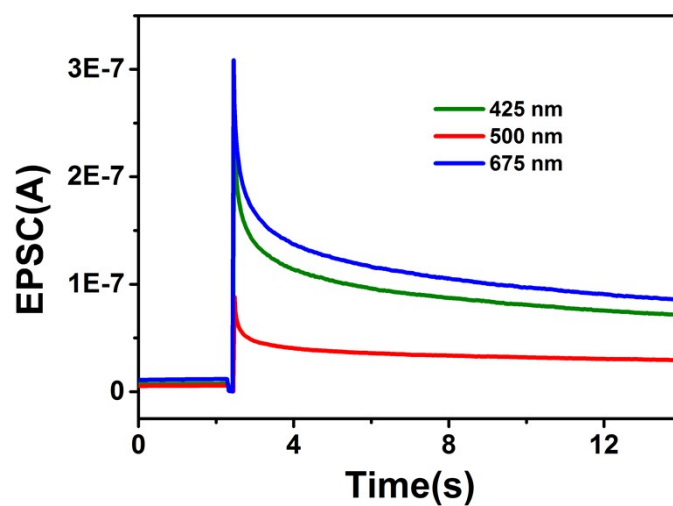

**Fig. S4** EPSC generated with different light wavelength and the same voltage pulse (15 V, 150 ms).

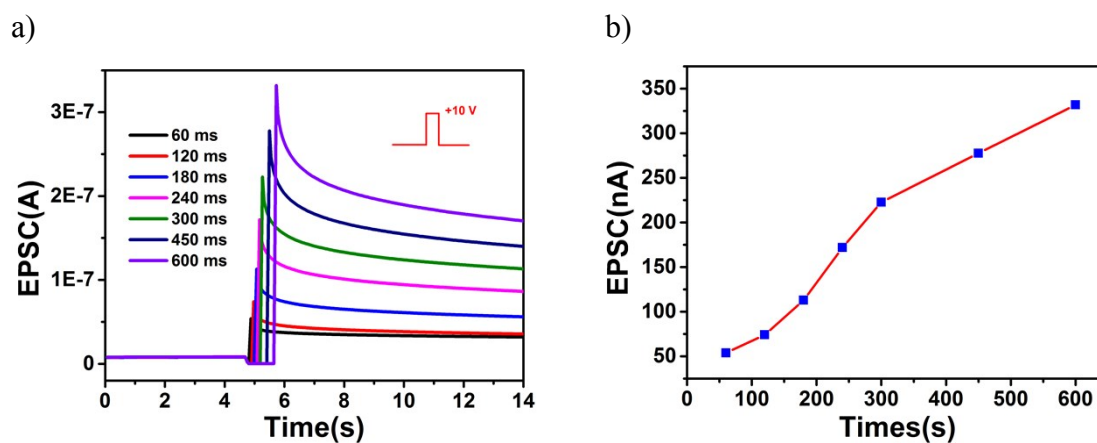

**Fig. S5** a) EPSC triggered by gate voltages pulses ( $V_G=10$  V) with different pulse duration times (60, 120, 180, 240, 300, 450 and 600 ms). b) Pulse duration dependent of EPSC change.

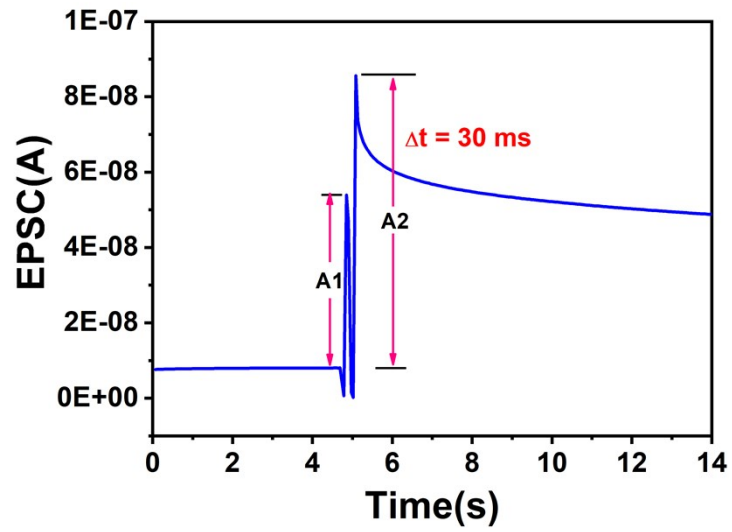

**Fig. S6** The EPSC triggered by pair of positive input spikes (10 V) with a time interval 30 ms.

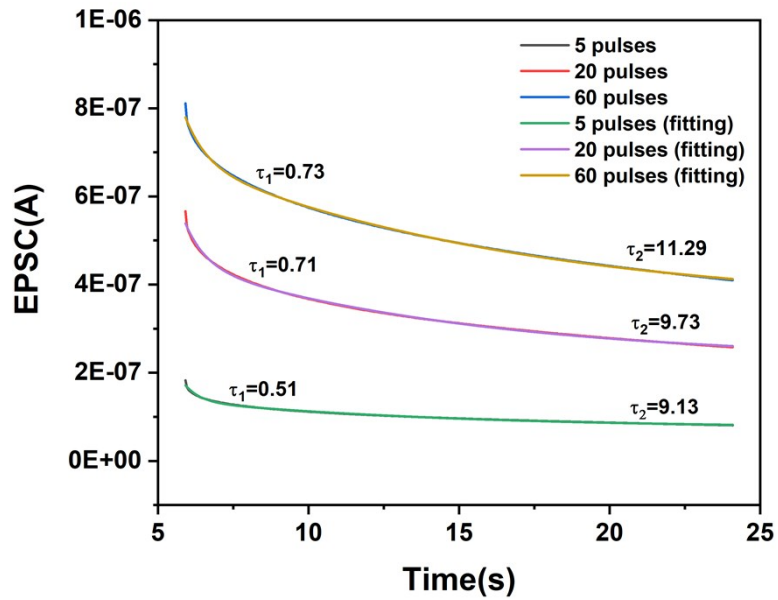

**Fig. S7** EPSC curves triggered by different pulses fitted by double-exponential function.

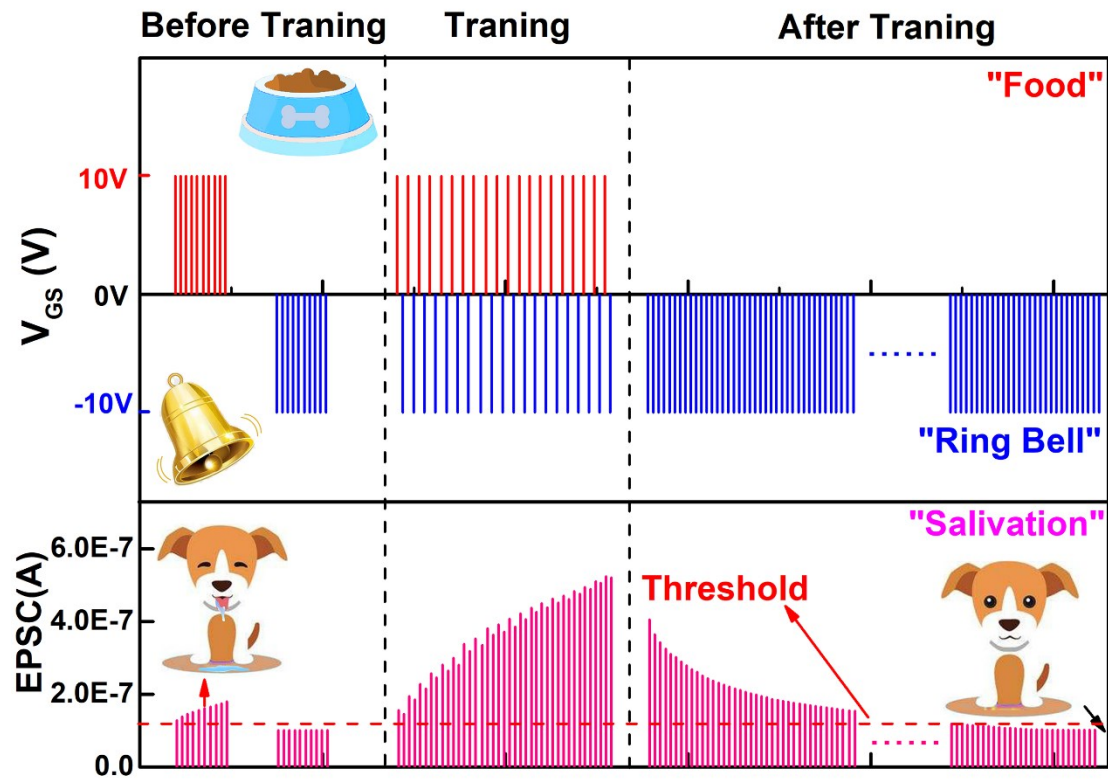

**Fig. S8** Schematic diagram of the concept of Pavlov's dog experiment for associative memory.

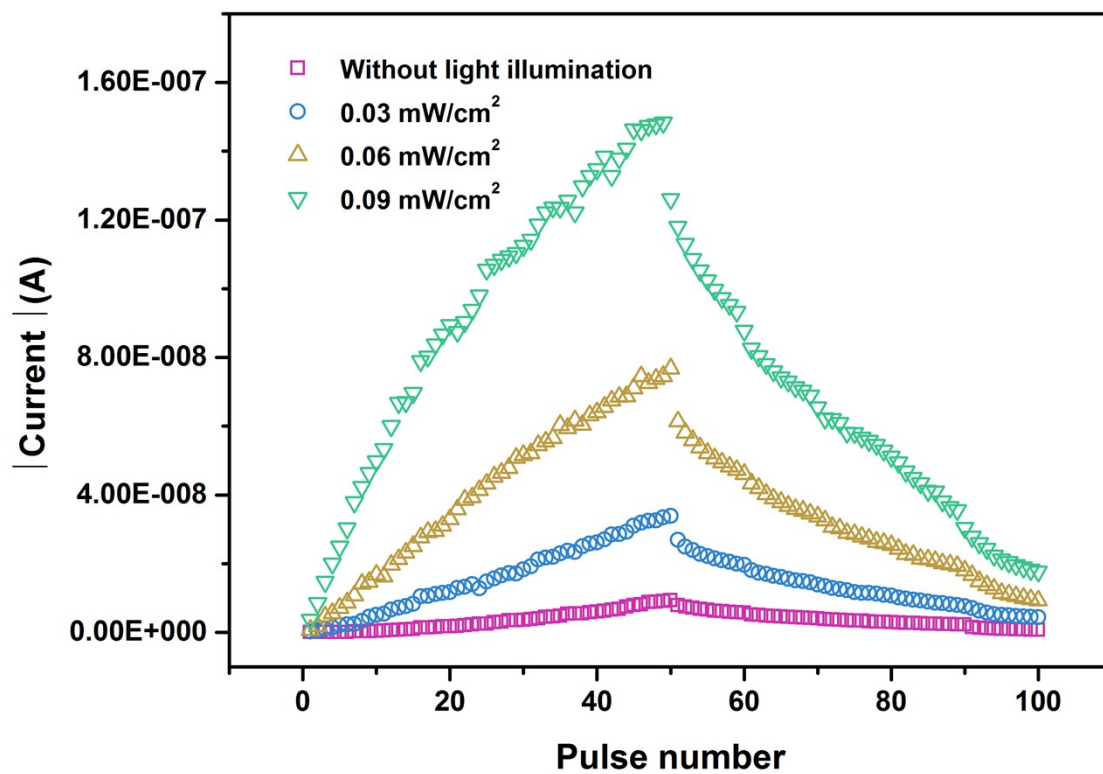

**Fig. S9** Plots of the PSC as a function of the number of electrical pulses while consecutively applying a series of positive pulses and negative pulse in the presence of light illumination with different light intensity and absence of light illumination.
